# Supplementary material for: Redesigning the synthesis of vidarabine via a multienzymatic reaction catalyzed by immobilized nucleoside phosphorylases
Source: Royal Society of Chemistry journal article supplement (doi:10.1039/c4ra15018j), 2015-01-01

## Redesigning the synthesis of Vidarabine *via* a multienzymatic reaction catalyzed by immobilized nucleoside phosphorylases

Immacolata Serra, Simona Daly, Andrés R. Alcántara, Davide Bianchi, Marco Terreni and Daniela Ubiali

### E-factor calculations

2-L scale

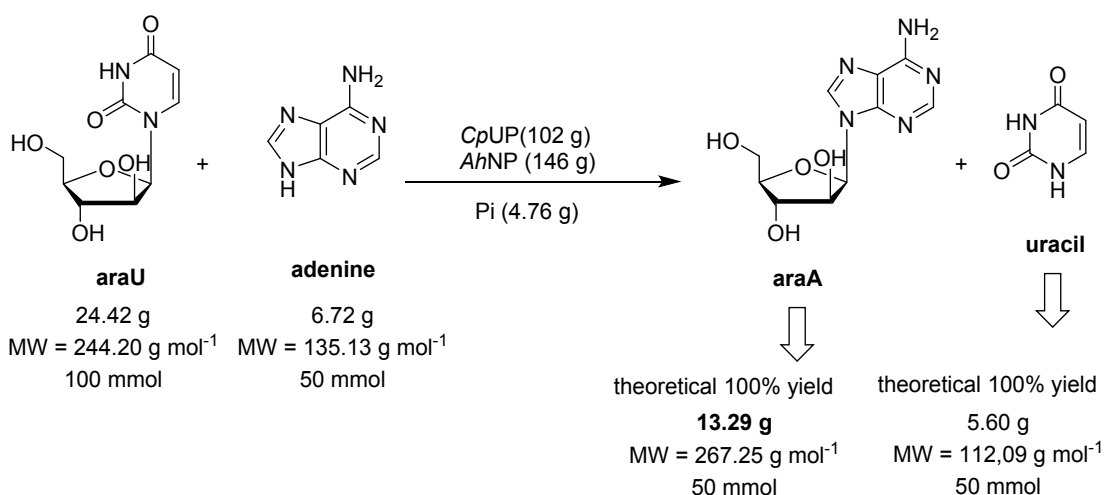

|                                 | araU + A $\rightleftharpoons$ araA + U |         |         |         |
|---------------------------------|----------------------------------------|---------|---------|---------|
|                                 | araU                                   | A       | araA    | U       |
| <b>t = 0</b>                    | 100 mmol                               | 50 mmol |         |         |
| <b>t = 26 h</b><br>(conv. 100%) | 50 mmol                                | 50 mmol | 50 mmol | 50 mmol |
| <b>t = 26 h</b><br>(conv. 78%)  | 61 mmol                                | 11 mmol | 39 mmol | 39 mmol |
| <b>t = 26 h</b><br>(conv. 78%)  | 14.9 g                                 | 1.49 g  | 10.42 g | 4.37 g  |

Final conversion: 10.42 g (78%)

Final yield: 7.04 g (53%)

Purity: 98.7 %

**FINAL AMOUNT OF araA (REAL) = 6.99 g.**

## CALCULATIONS

As described by Maity, P.; Gopinath, C. S.; Bhaduri, S.; Lahiri, G. K. Applications of a high performance platinum nanocatalyst for the oxidation of alcohols in water. Green Chem. 2009, 11, 554-561.

### 1.-BASED ON ANALYTICAL YIELD (78%), WHITOUT CONSIDERING NEITHER ENZYME WASTE NOR SOLVENTS.

Total amounts of reactants: 24.42 g (araU) +6.76 g (A) = 31.18 g

Total amounts of product (araA) = 10,42 g

Amount of waste from non converted reagents: 14.9 g (araU) +1,49 g(A) = 16.39 g

Amount of waste from byproducts: 4.37 g (U) + 4.76 g (Pi) = 9,13

Total amount of waste = 16.39 +9,13 = 25.52 g

**E-FACTOR: (25.52/ 10.42) = 2,45**

### 2.-BASED ON ANALYTICAL YIELD (78%), CONSIDERING ENZYME WASTE but NOT SOLVENTS.

Total amounts of reactants: 24.42 g (araU) +6.76 g (A) = 31.18 g

Total amounts of product (araA) = 10,42 g

Amount of waste from non converted reagents: 14.9 g (araU) +1,49 g(A) = 16.39 g

Amount of waste from byproducts: 4.37 g (U) +4.76 g (Pi) +102 g (CpUP) + 146 g (AhNP) = 257,13

Total amount of waste = 16.39 +257,13 = 273.52 g

**E-FACTOR: (273.52/ 10.42) = 26,25**

### 3.-BASED ON ANALYTICAL YIELD (78%), CONSIDERING SOLVENTS

Total amounts of reactants: 24.42 g (araU) +6.76 g (A) = 31.18 g

Total amounts of product (araA) = 10,42 g

Amount of waste from non converted reagents: 14.9 g (araU) +1,49 g(A) = 16.39 g

Amount of waste from byproducts: 4.37 g (U) +4.76 g (Pi) + 2000 g (water, 2L) + 944 g (DMF, final 50%, density = 0.944) = 2,953.13

Total amount of waste = 16.39 + 2,953.13 = 2,969,52 g

**E-FACTOR: (2,969.52/ 10.42) = 285**

**4.-BASED ON ANALYTICAL YIELD (78%), CONSIDERING ENZYME WASTE and SOLVENTS.**

Total amounts of reactants: 24.42 g (araU) + 6.76 g (A) = 31.18 g

Total amounts of product (araA) = 10,42 g

Amount of waste from non converted reagents: 14.9 g (araU) + 1,49 g(A) = 16.39 g

Amount of waste from byproducts: 4.37 g (U) + 4.76 g (Pi) + 102 g (CpUP) + 146 g (AhNP) + 2000 g (water, 2L) + 944 g (DMF, final 50%, density = 0.944) = 3,201.13

Total amount of waste = 16.39 + 3,201.13 = 3,217.52 g

**E-FACTOR: (3,217.52/ 10.42) = 308,8**

## **CALCULATIONS**

### **1.-BASED ON FINAL YIELD (53%), WHITOUT CONSIDERING NEITHER ENZYME WASTE NOR SOLVENTS.**

Total amounts of reactants: 24.42 g (araU) +6.76 g (A) = 31.18 g

Total amounts of product (araA) = 6,99 g

Amount of waste from non converted reagents: 14.9 g (araU) +1,49 g(A) = 16.39 g

Amount of waste from byproducts: 4.37 g (U) + 4.76 g (Pi) = 9,13

Total amount of waste = 16.39 +9,13 = 25.52 g

**E-FACTOR: (25.52/ 6.99) = 3.65**

---

### **2.-BASED ON FINAL YIELD (53%), CONSIDERING ENZYME WASTE but NOT SOLVENTS.**

Total amounts of reactants: 24.42 g (araU) +6.76 g (A) = 31.18 g

Total amounts of product (araA) = 6.99 g

Amount of waste from non converted reagents: 14.9 g (araU) +1,49 g(A) = 16.39 g

Amount of waste from byproducts: 4.37 g (U) +4.76 g (Pi) +102 g (CpUP) + 146 g (AhNP) = 257,13

Total amount of waste = 16.39 +257.13 = 273.52 g

**E-FACTOR: (273.52/ 6.99) = 39.13**

---

### **3.-BASED ON FINAL YIELD (53%), CONSIDERING SOLVENTS**

Total amounts of reactants: 24.42 g (araU) +6.76 g (A) = 31.18 g

Total amounts of product (araA) = 6.99 g

Amount of waste from non converted reagents: 14.9 g (araU) +1,49 g(A) = 16.39 g

Amount of waste from byproducts: 4.37 g (U) +4.76 g (Pi) + 2000 g (water, 2L) + 944 g (DMF, final 50%, density = 0.944) = 2,953.13

Total amount of waste = 16.39 +2,953.13= 2,969,52 g

**E-FACTOR: (2,969.52/ 6.99) = 424.8**

---

**4.-BASED ON FINAL YIELD (53%), CONSIDERING ENZYME WASTE and SOLVENTS.**

Total amounts of reactants: 24.42 g (araU) +6.76 g (A) = 31.18 g

Total amounts of product (araA) = 10,42 g

Amount of waste from non converted reagents: 14.9 g (araU) +1,49 g(A) = 16.39 g

Amount of waste from byproducts: 4.37 g (U) +4.76 g (Pi) +102 g (CpUP) + 146 g (AhNP) + 2000 g (water, 2L) + 944 g (DMF, final 50%, density = 0.944) = 3,201.13

Total amount of waste = 16.39 +3,201.13 = 3,217.52 g

**E-FACTOR: (3,217.52/ 6.99) = 460.3**

**CHEMICAL SYNTHESIS, according to Glaudemans, C. P. J.; Fletcher, J. Journal of Organic Chemistry 1963, 28, 3004–3006.**

**1.-FIRST STEP**

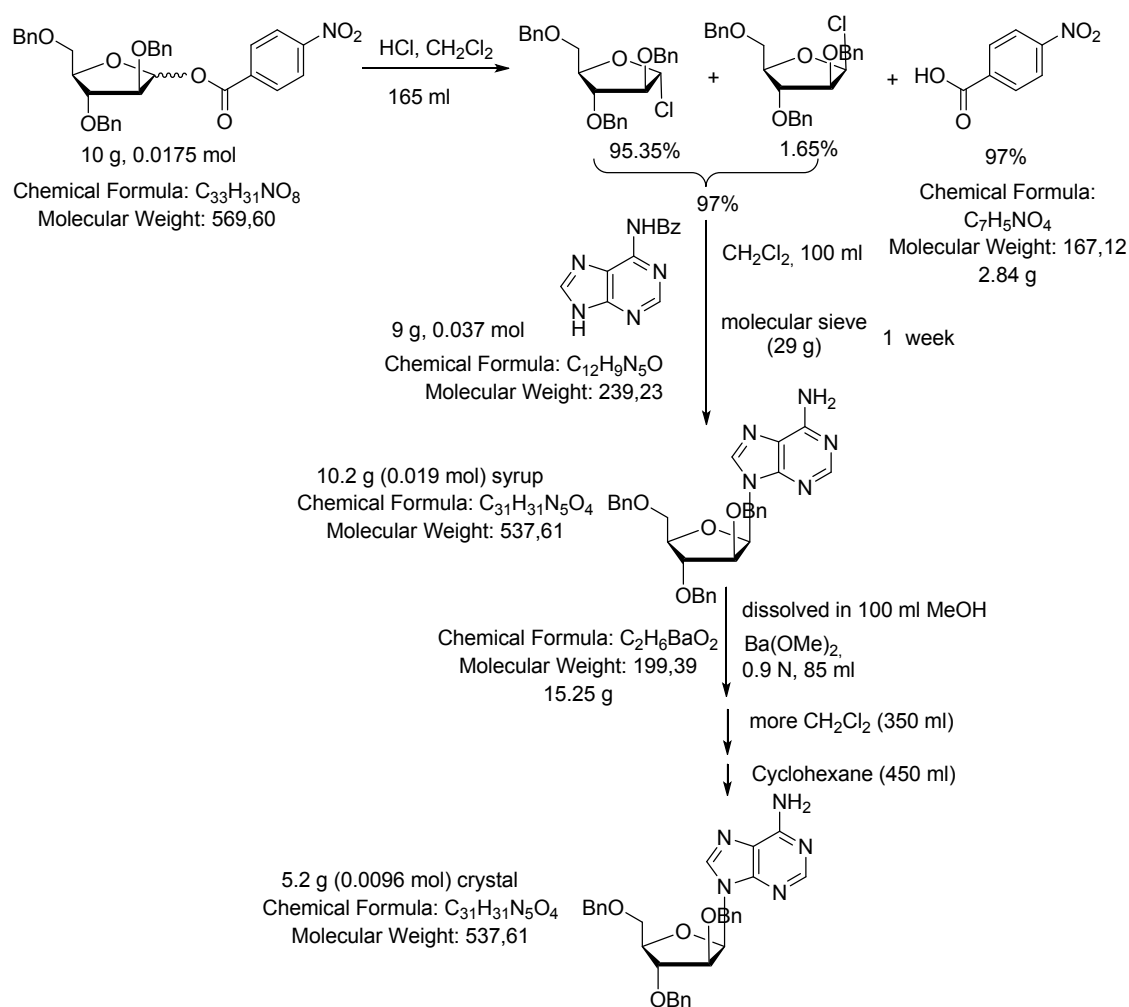

**1.1.-WHITOUT CONSIDERING SOLVENTS.**

Total amounts of reactants: 10 g (2,3 5-tri-*O*-benzyl-1-*O*-*p*-nitrobenzoyl-*D*-arabinofuranose) +9 g (*N*-benzoyladenine) + 0.62 g HCl (estimated, from 97% yield of theoretical 0.0175 mol) += 19.62 g

Total amounts of product (9-(2,3,5-Tri-*O*-benzyl-(β-*D*-arabinofuranosyl)adenine) = 5,2 g

Amount of waste:

- non converted reagents: 0.3 g (non converted substrate)

- 2.84 g (p-nitrobenzoic acid)
- 29 g (molecular sieve, not considered)
- 15.25 g (Ba(OMe)<sub>2</sub>)

Total amount of waste = 0.3 + 2.84 + 15.25 = 18.39 g

**E-FACTOR: (18.39/ 5.2) = 3.5**

---

## 1.2.-CONSIDERING SOLVENTS.

Total amounts of reactants: 10 g (2,3,5-tri-*O*-benzyl-1-*O*-*p*-nitrobenzoyl-*D*-arabinofuranose) + 9 g (*N*-benzoyladenine) + 0.62 g HCl (estimated, from 97% yield of theoretical 0.0175 mol) += 19.62 g

Total amounts of product (9-(2,3,5-Tri-*O*-benzyl-( $\beta$ -*D*-arabinofuranosyl)adenine) = 5,2 g

Amount of waste:

- non converted reagents: 0.3 g (non converted substrate)
- 2.84 g (p-nitrobenzoic acid)
- 29 g (molecular sieve, not considered)
- 15.25 g (Ba(OMe)<sub>2</sub>)
- SOLVENTS:
  - CH<sub>2</sub>Cl<sub>2</sub> = 515 ml x 1.33 g/ml = 685 g
  - C<sub>6</sub>H<sub>12</sub> = 450 ml x 0.78 g/ml = 351g

Total amount of waste = 0.3 + 2.84 + 15.25 + 685 + 351 = 1,046.5 g

**E-FACTOR: (1,046.5/ 5.2) = 201.2**

---

## 2.-SECOND STEP

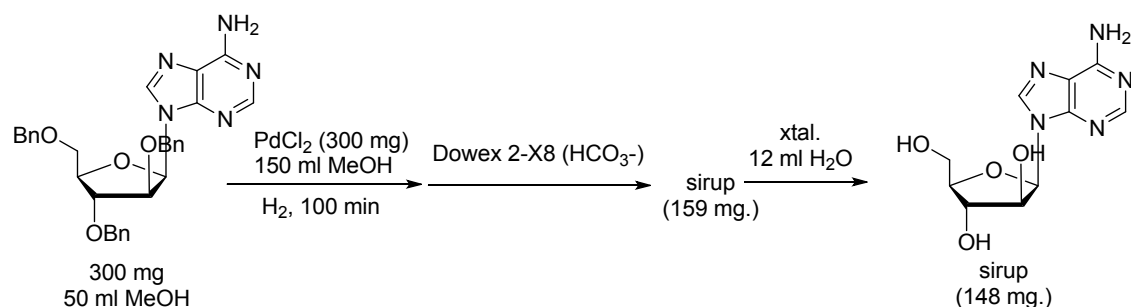

### 2.1.-WHITOUT CONSIDERING SOLVENTS.

Total amounts of reactants: 0.3 g (9-(2,3,5-tri-*O*-benzyl  $\beta$ -*D*-arabinofuranosyl)adenine) + 0.3 g PdCl<sub>2</sub> = 0.6 g

Total amounts of product (9-( $\beta$ -*D*-arabinofuranosyl)adenine) = 0.148 g

Amount of waste:  $0.6 - 0.148 = 0.452$

**E-FACTOR:  $(0.452 / 0.148) = 3.05$**

---

## 2.2.- CONSIDERING SOLVENTS

Total amounts of reactants:  $0.3 \text{ g}$  (9-(2,3,5-tri-O-benzyl  $\beta$ -D-arabinofuranosyl)adenine)  
+  $0.3 \text{ g PdCl}_2 = 0.6 \text{ g}$

Total amounts of product (9-( $\beta$ -D-arabinofuranosyl)adenine) =  $0.148 \text{ g}$

Amount of waste:

- SOLVENTS:
  - $\text{CH}_3\text{OH} = 200 \text{ ml} \times 0.7918 \text{ g/ml} = 158.4 \text{ g}$
  - $\text{H}_2\text{O} = 12 \text{ ml} \times 1 \text{ g/ml} = 12 \text{ g}$

$(0.6 - 0.148 = 0.452) + 158.4 + 12 = 171 \text{ g}$

**E-FACTOR:  $(171 / 0.148) = 1155$**

---

## 3.- OVERALL DATA: Considering both steps

### 3.1.- WITHOUT CONSIDERING SOLVENTS

**Mean value:  $(2 + 3.05) / 2 = 2.5$**

### 3.2.- CONSIDERING SOLVENTS

**Mean value:  $(201,2 + 1155) / 2 = 678$**



**Figure S1 Chromatogram of the purified araA (from 2 L reaction, see Table 5).**

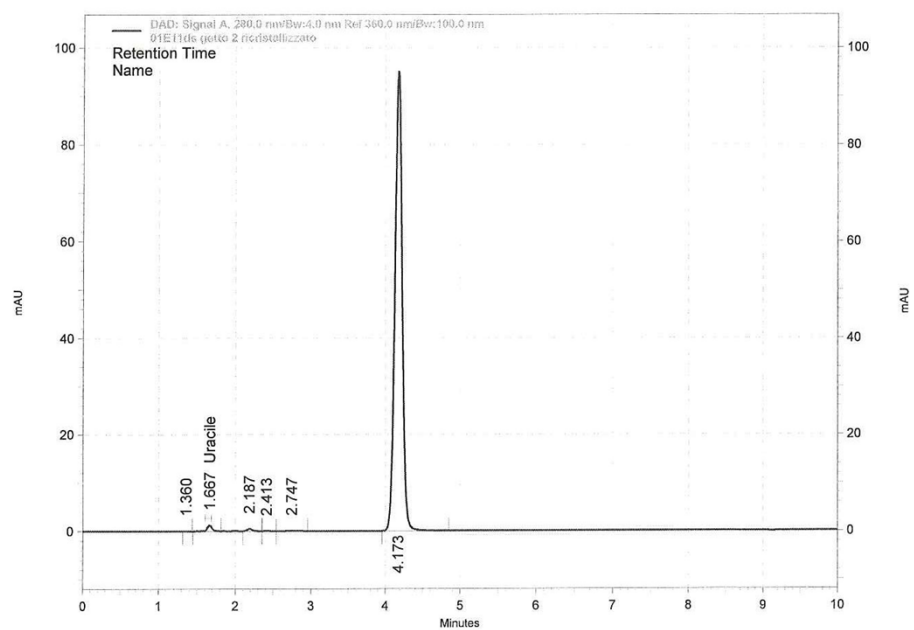

Figure S2  $^1\text{H}$  NMR spectrum of the purified araA (from 2 L reaction, see Table 5).

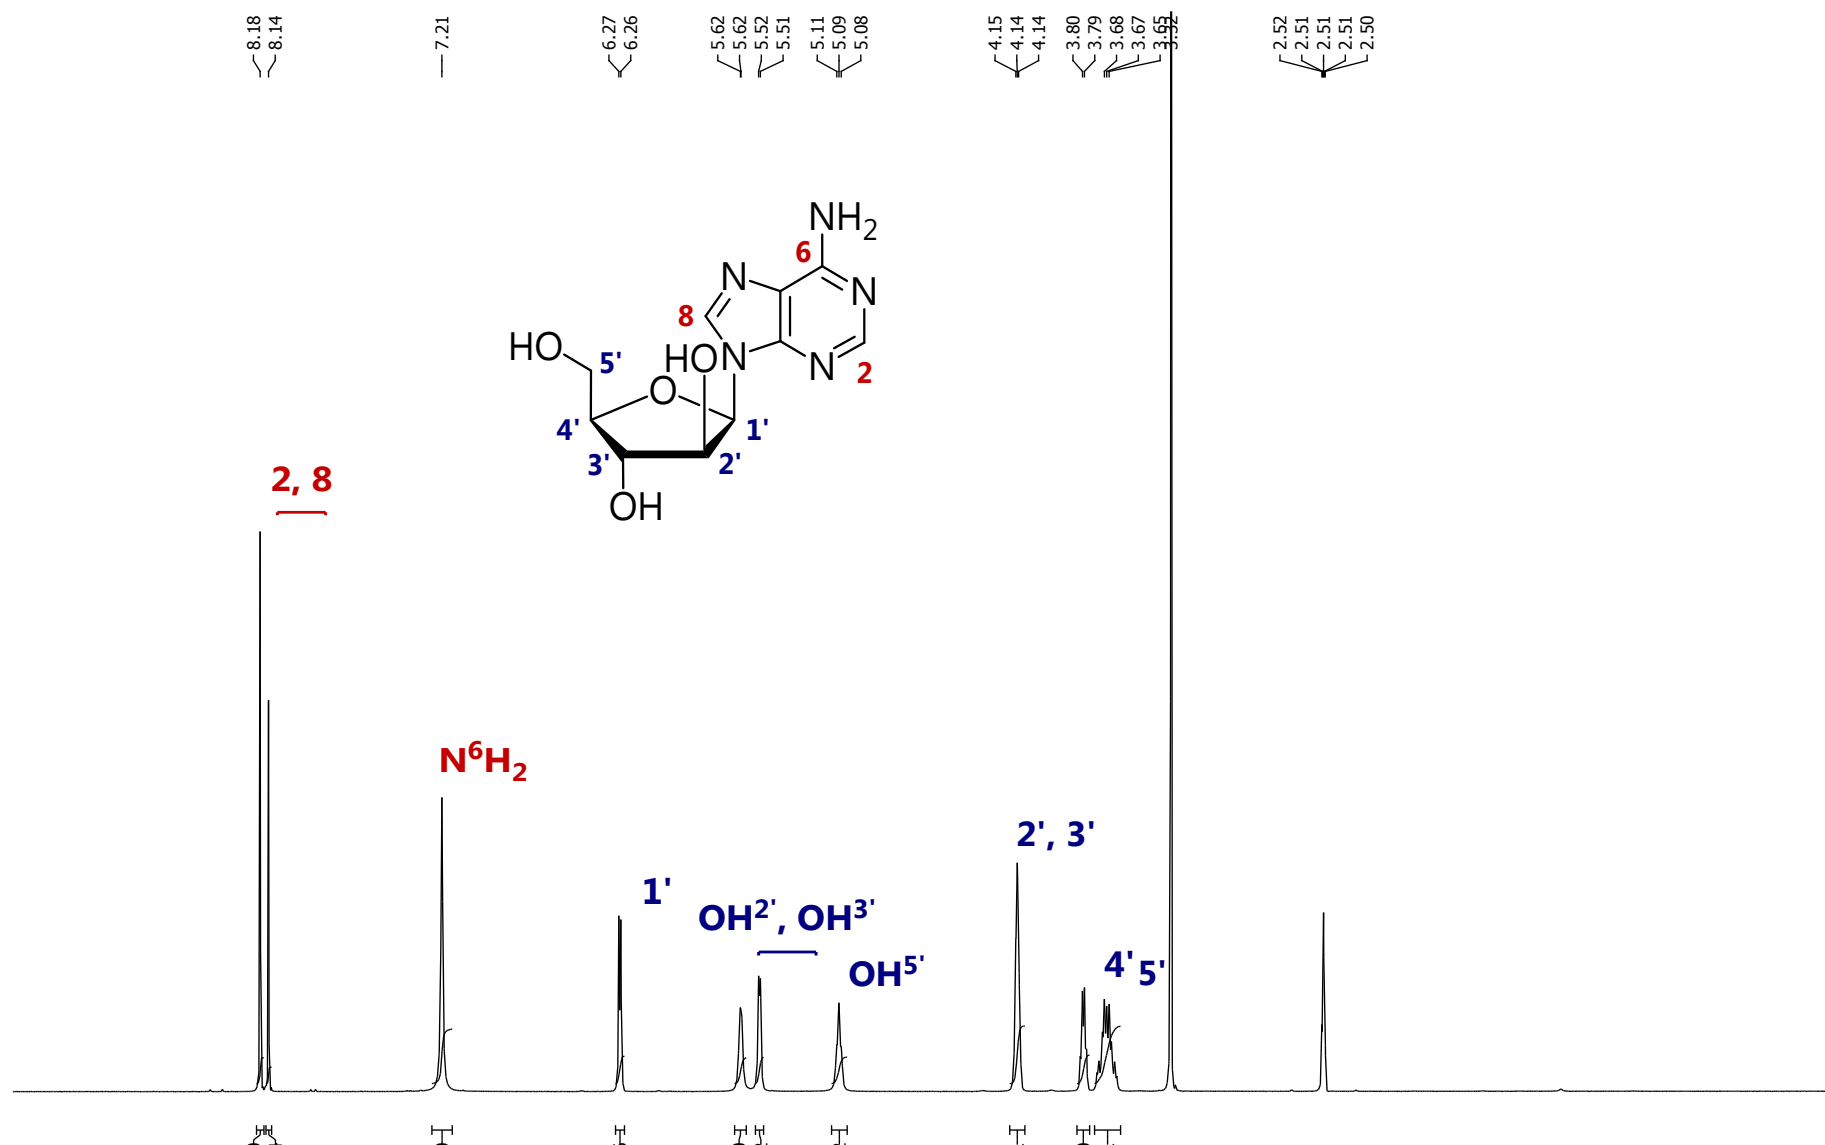

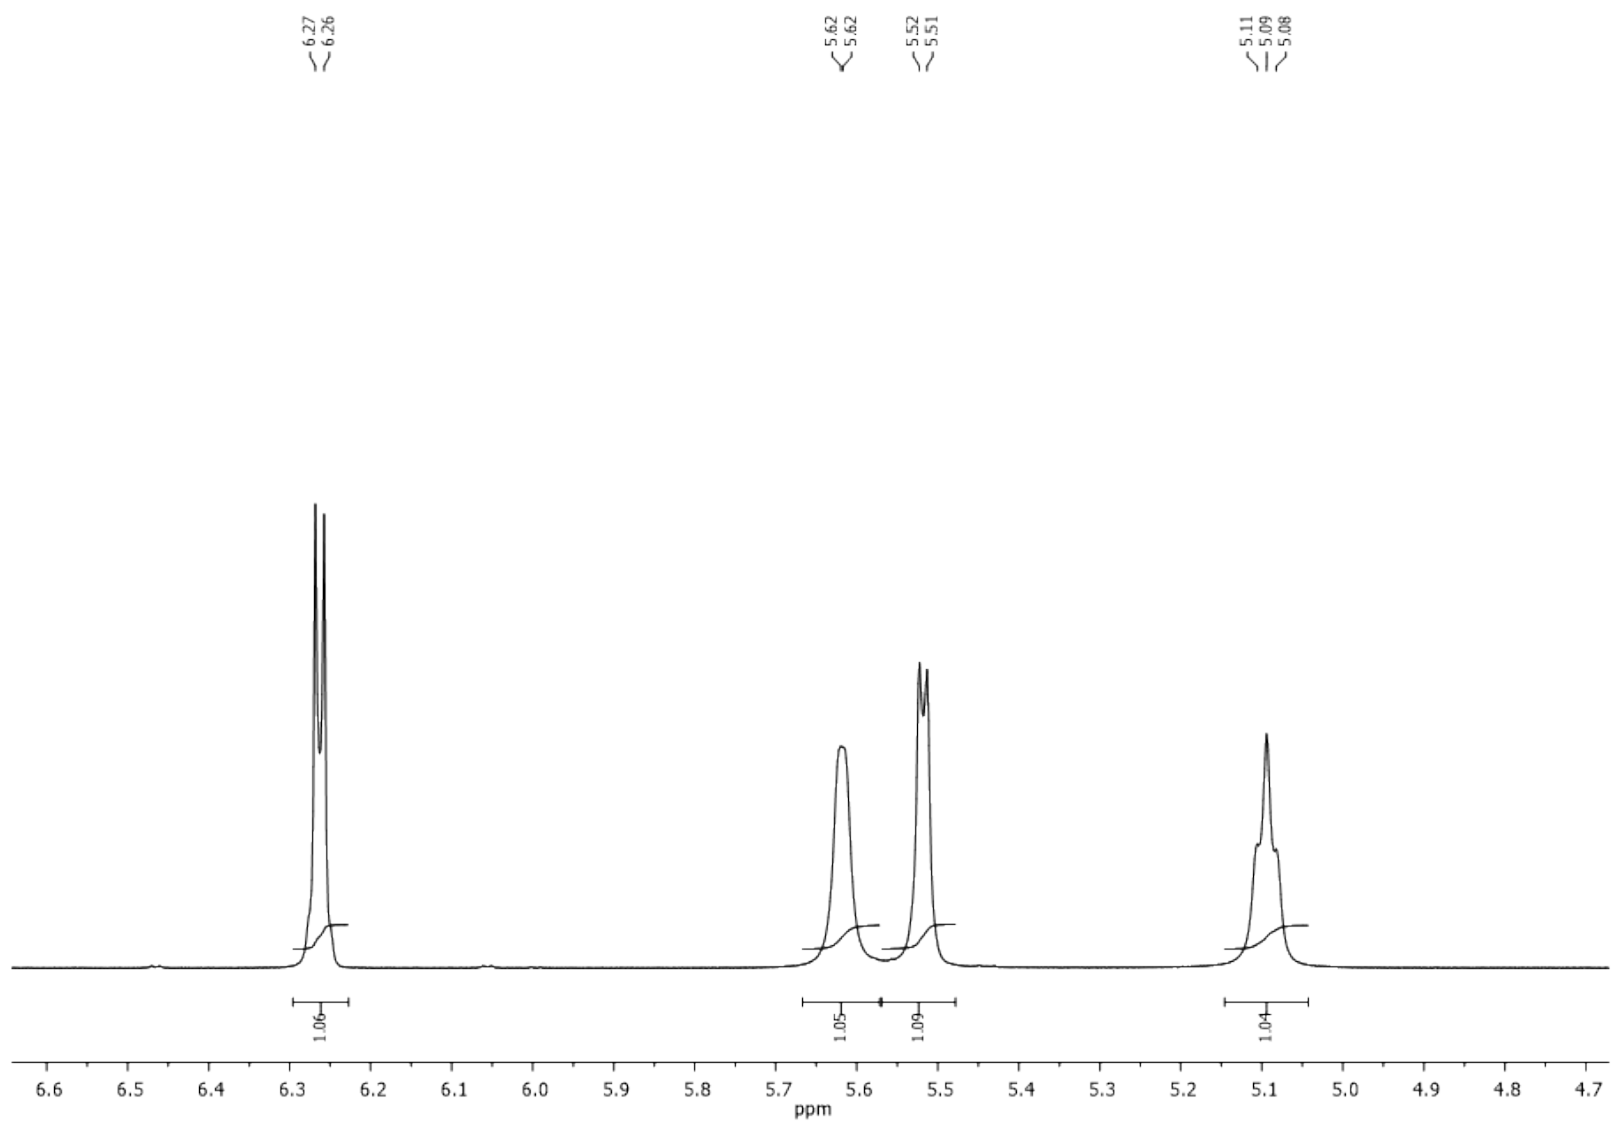

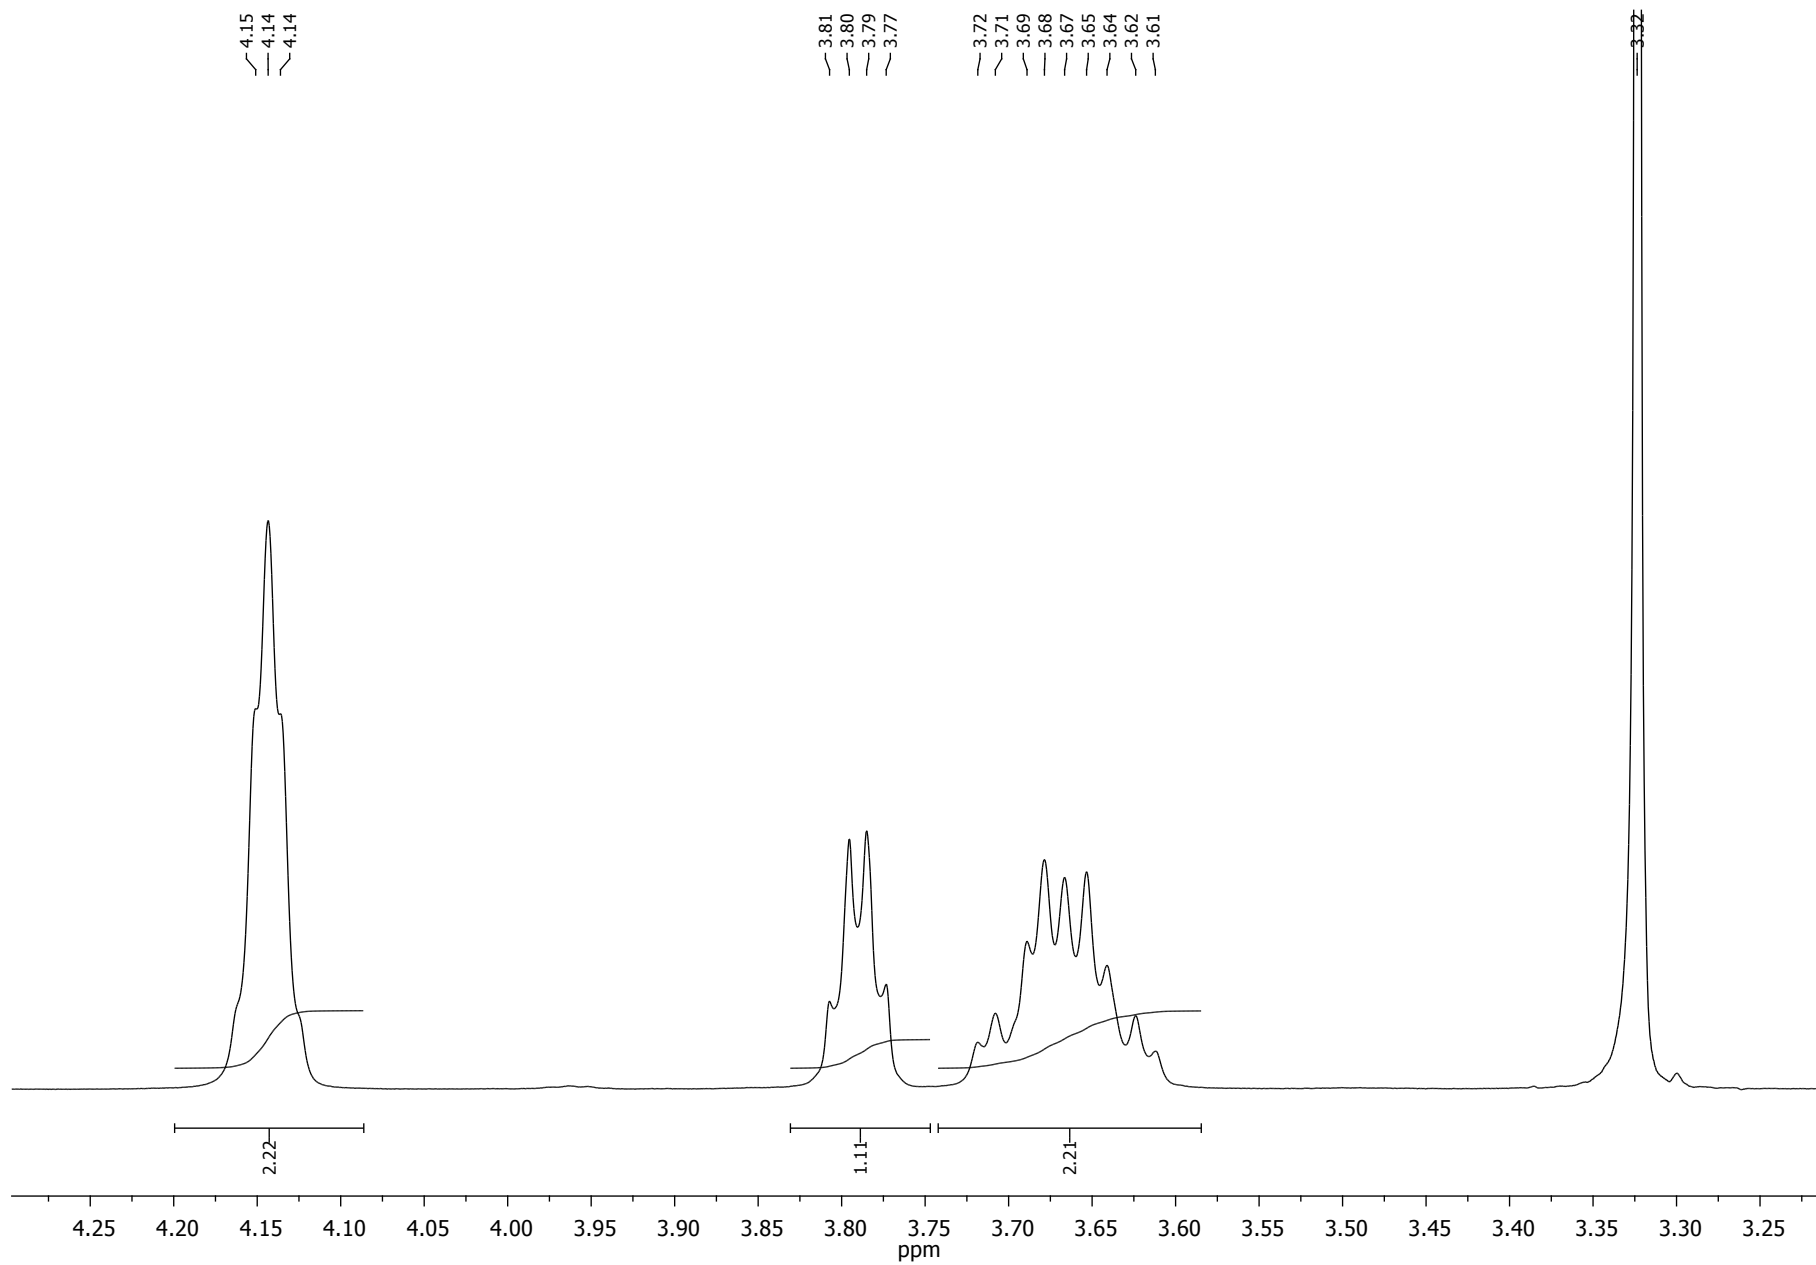

Figure S3 ESI-Q-ToF-MS spectrum of the purified araA (from 2 L reaction, see Table 5).

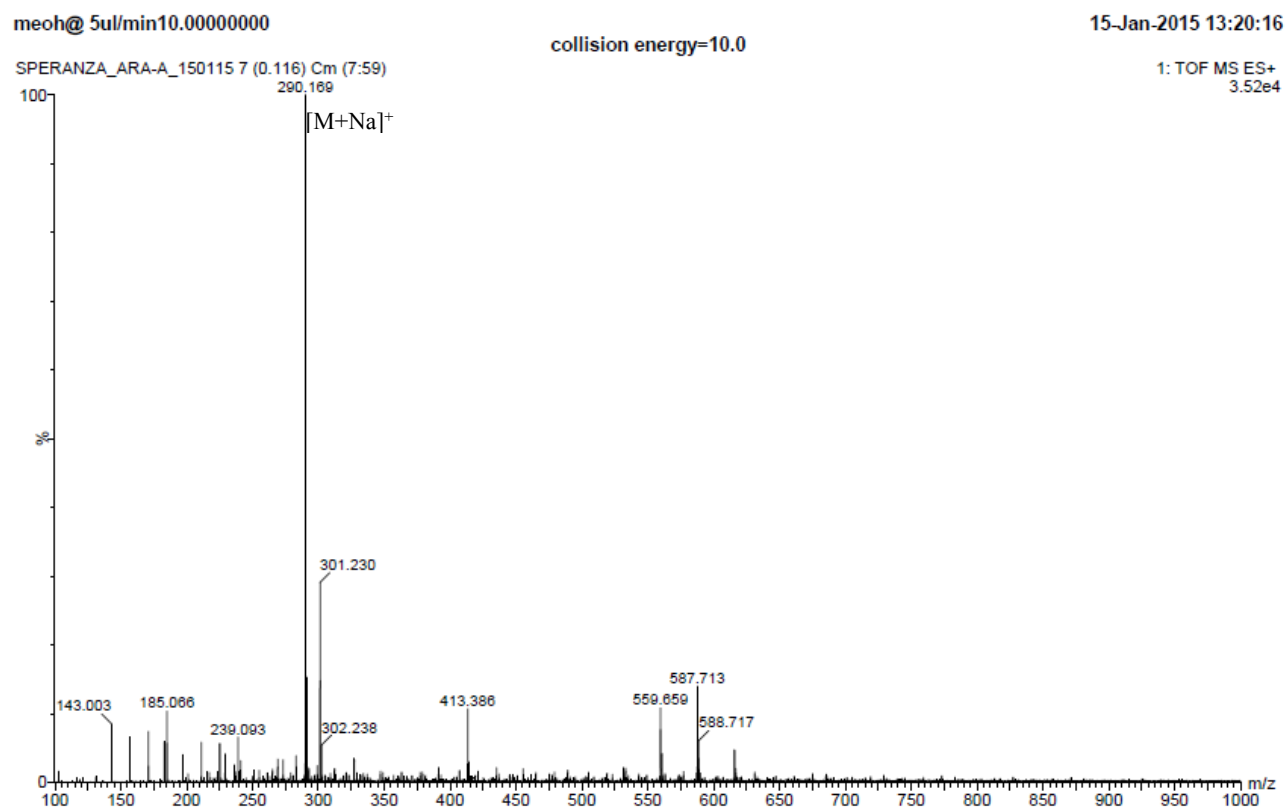

Supplement: c4ra15018j1.pdf [file c4ra15018j1.pdf]
